# Supplementary material
Source: HighWire-hosted journal article supplement (http://www.cmaj.ca/highwire/filestream/59396/field_highwire_adjunct_files/0/150085-res-1-at.pdf)
Supplement: 150085-res-1-at.pdf [file 150085-res-1-at.pdf]

Appendix 1 (as supplied by the authors): Linear regression model results assessing the effect of age at injury (under 70 years vs  $\geq 70$  years) on the time from admission to surgery (in hours).

| Parameter                                                    | Estimate | 95% CI              |
|--------------------------------------------------------------|----------|---------------------|
| Intercept                                                    | 2.97737  | (2.74262-3.21212)   |
| Mechanism of injury = fall                                   | 0.10996  | (-0.05379-0.27371)  |
| Energy of injury = high                                      | -0.04812 | (-0.21273-0.11649)  |
| AIS A or B                                                   | -0.39609 | (-0.55149--0.24068) |
| Neurological level                                           |          |                     |
| High cervical (C1-C4)                                        | 0.35210  | (0.13498-0.56922)   |
| Low cervical (C5-T1)                                         | 0.10065  | (-0.10922-0.31053)  |
| Thoracic (T2-T10)                                            | 0.27942  | (0.04214-0.51669)   |
| Age at injury $\geq 70$ years                                | 0.39964  | (0.15715-0.64214)   |
| Note: AIS = ASIA Impairment Scale, CI = confidence interval. |          |                     |
